# Supplementary material
Source: Springer Nature journal article supplement (https://www.springermedizin.de/resource/supplementary/12985_2009_539_MOESM6_ESM.pdf/9608406)

**A. Mo cells, CAR expression**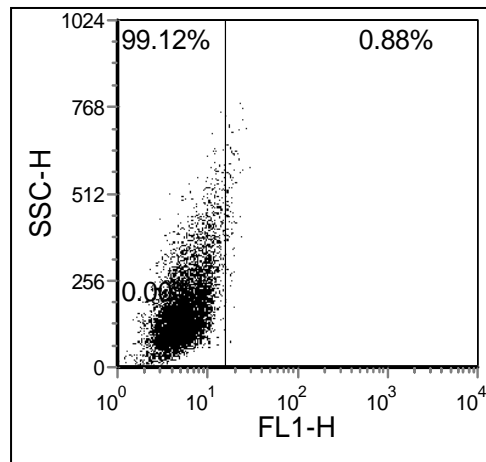**B. HEK 293 cells, CAR expression**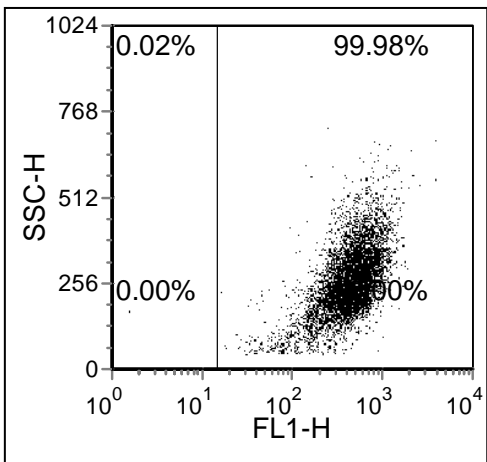**C. Platelets, CAR expression**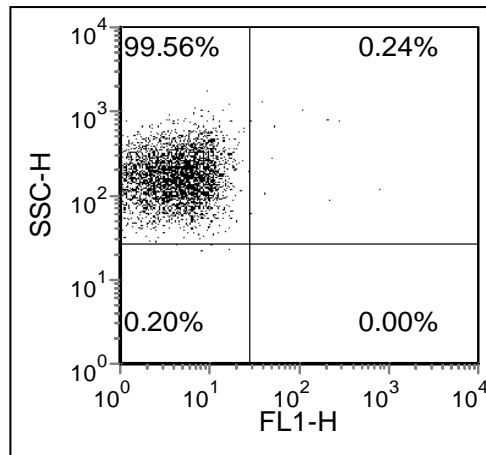**D. Platelets, CD41 expression**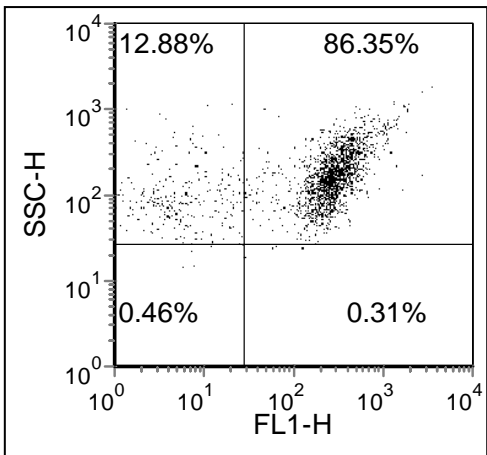

Supplement: MOESM6 [file 9608406]
